# Supplementary material for: Recognition and processing of branched DNA substrates by Slx1–Slx4 nuclease
Source: PubMed Central journal article supplement (PMC6902002; doi:10.1093/nar/gkz842), 2019-10-04
Supplement: gkz842_supplemental_file.pdf [file gkz842_supplemental_file.pdf]

## SUPPLEMENTARY INFORMATION

### Recognition and processing of branched DNA substrates by Slx1-Slx4 nuclease

Vineet Gaur,<sup>1, &</sup> Weronika Ziajko,<sup>1</sup> Shivlee Nirwal,<sup>1</sup> Aleksandra Szlachcic,<sup>1</sup>

Marta Gapińska,<sup>1</sup> and Marcin Nowotny<sup>1, \*</sup>

<sup>1</sup>Laboratory of Protein Structure, International Institute of Molecular and Cell Biology, 4 Trojdena St.,  
02-109 Warsaw, Poland

& Current Address: National Institute of Plant Genome Research, Aruna Asaf Ali Marg, New Delhi  
110067, India

\* To whom correspondence should be addressed. e-mail: [mnowotny@iimcb.gov.pl](mailto:mnowotny@iimcb.gov.pl)

## SUPPLEMENTARY FIGURES

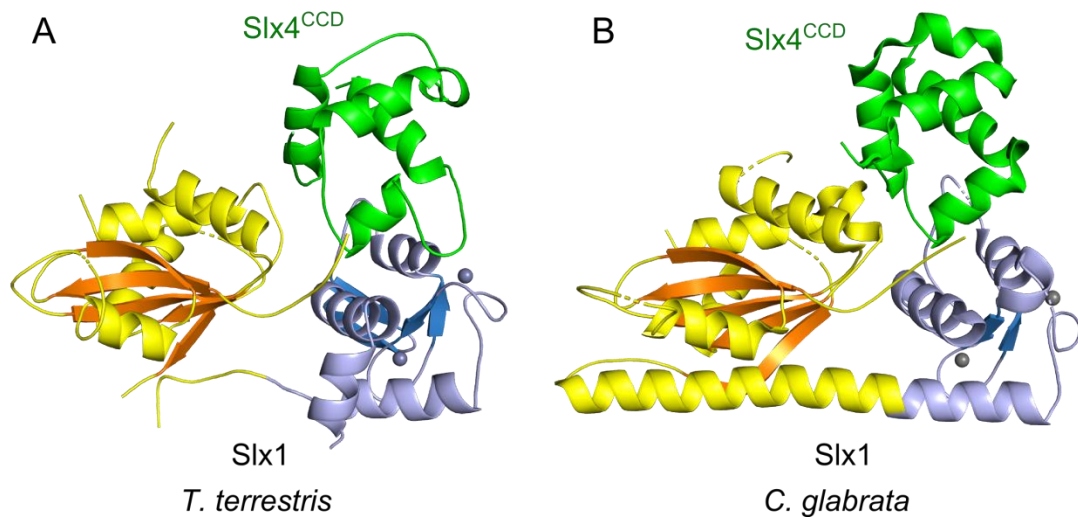

**Supplementary Figure S1. Overall structure of apo Slx1-Slx4<sup>CCD3</sup>.** (A) structure of *Tt*-Slx1-Slx4<sup>CCD3</sup> (present study). Slx1 nuclease domain is shown in yellow with  $\beta$ -strands in orange. RING domain is shown in blue. Slx4 is shown in green. Zinc ions are shown as gray spheres. (B) *C. glabrata* Slx1-Slx4<sup>CCD3</sup> (PDB ID: 4XLG).

A

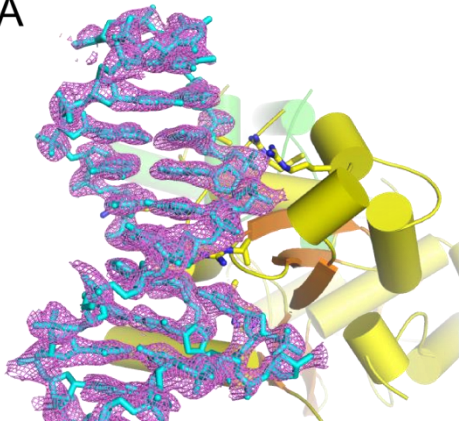

B

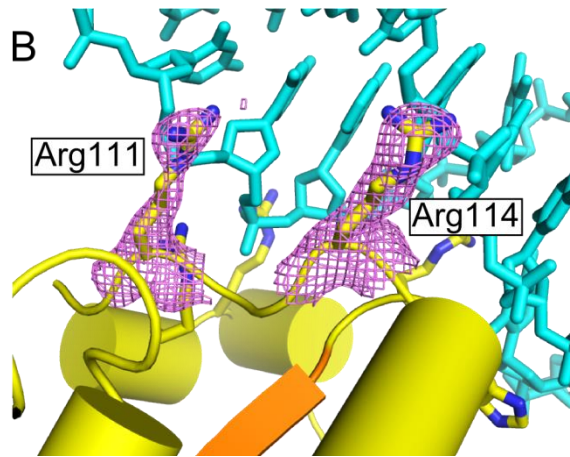

**Supplementary Figure S2. Simulated annealing composite-omit maps for *Tt*-Slx1-Slx4<sup>CCD3</sup>-DNA structure. 2Fo-Fc map contoured at 1.1  $\sigma$  is shown for the DNA model (A) and selected DNA-binding residues (B).**

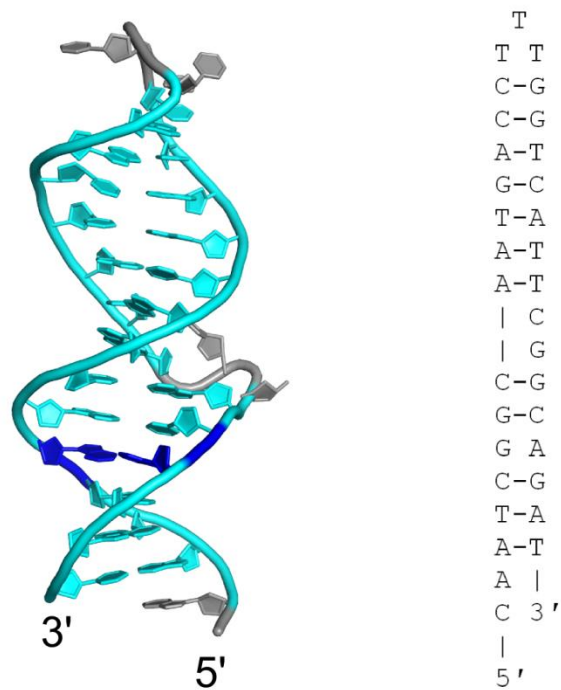

**Supplementary Figure S3. Structure of the DNA.** (Left) Structure of the DNA from the *Tt-Slx1-Slx4<sup>CCD3-</sup>* DNA structure. The DNA is shown in cyan for canonical base pairs, in blue for single G-A mismatch and in gray for unpaired bases (Right) Schematic of base pairing in this DNA.

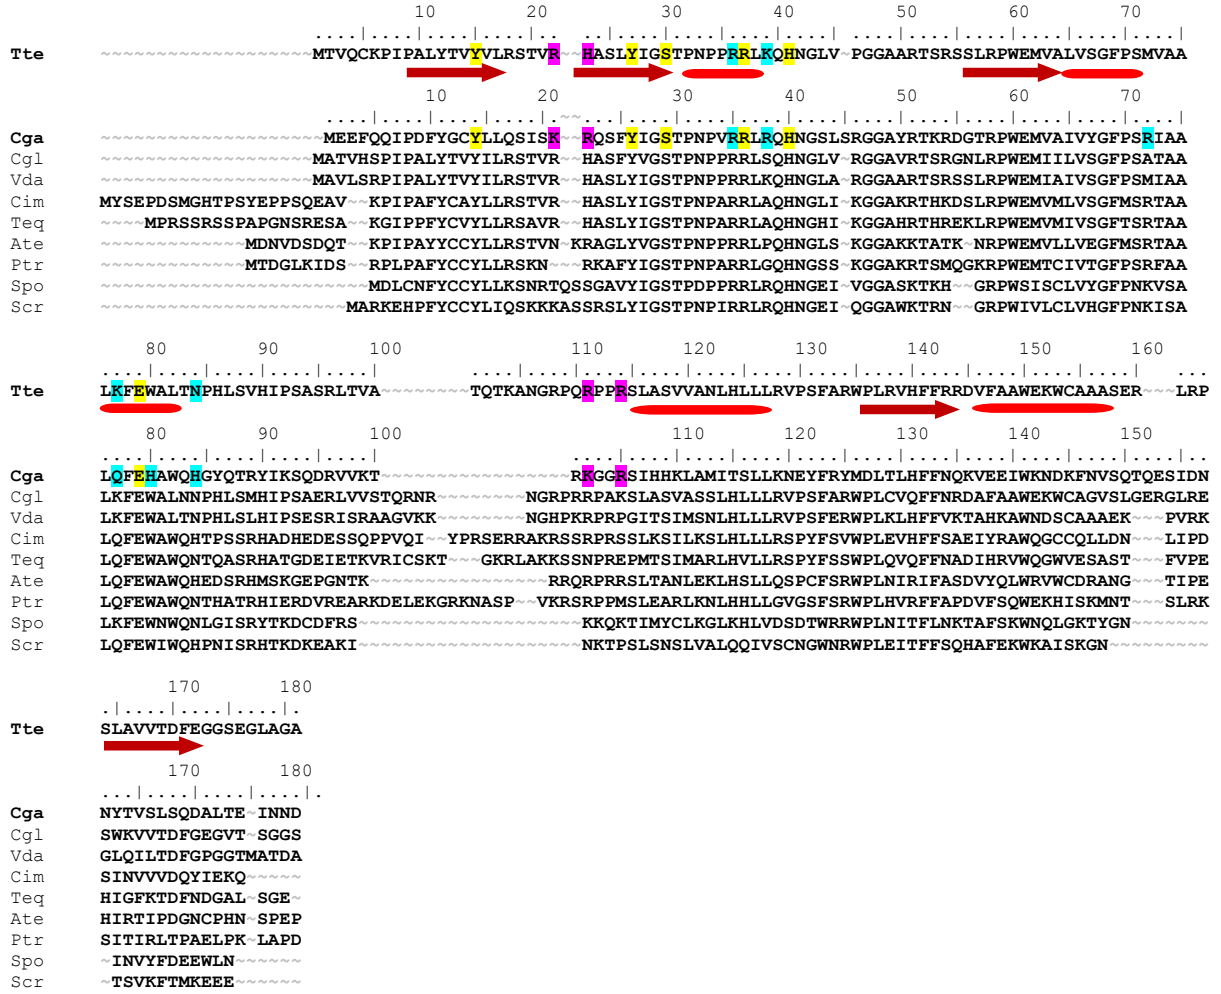

**Supplementary Figure S4. Multiple sequence alignment of nuclease domains of fungal Slx1 proteins.**

Secondary structure elements are shown for *Tte*-Slx1 (arrows for  $\beta$ -strands and cylinders for  $\alpha$ -helices). Residues that are involved in DNA binding at the new interface are highlighted in purple. Active-site residues are shown in yellow. Predicted site I and II residues are shown in cyan. *Tte*, *Thelavia terrestris*; *Cga*, *Candida glabrata*; *Pgt*, *Puccinia graminis tritici*; *Cgl*, *Chaetomium globosum*; *Vda*, *Verticillium dahlia*; *Cim*, *Coccidioides immitis*; *Teq*, *Trichophyton equinum*; *Ate*, *Aspergillus terreus*; *Ptr*, *Pyrenophora tritici-repentis*; *Spo*, *Schizosaccharomyces pombe*; *Scr*, *Schizosaccharomyces cryophilus*.

A

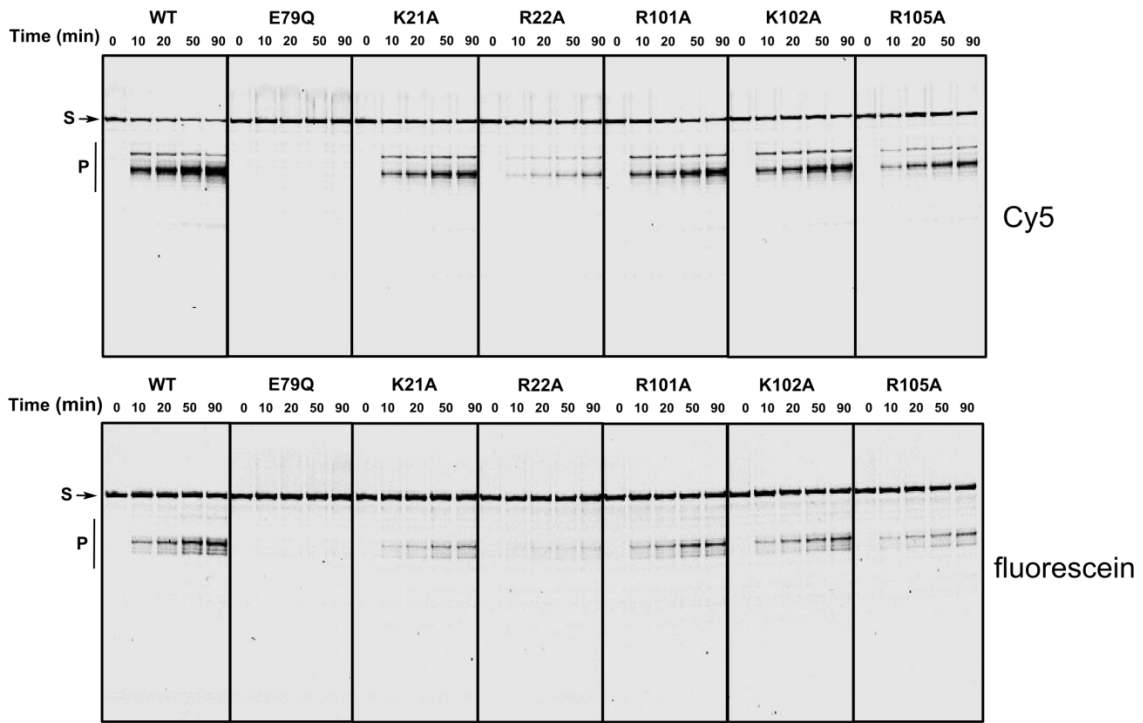

B

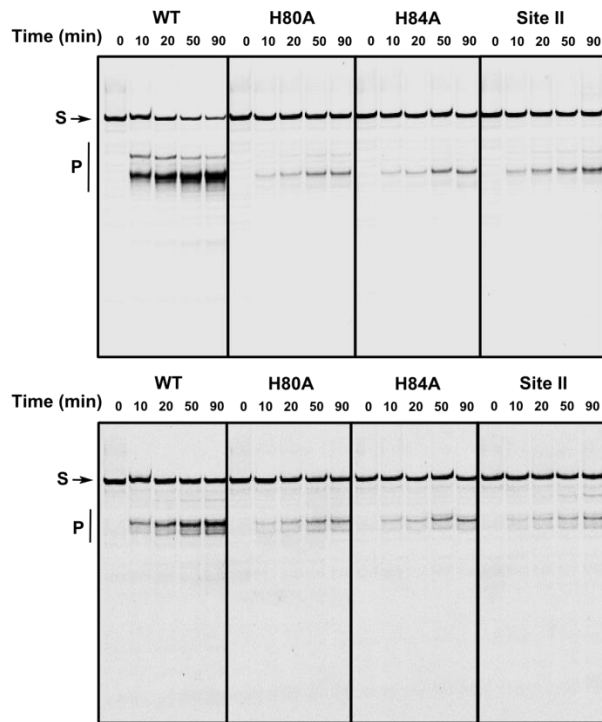

C

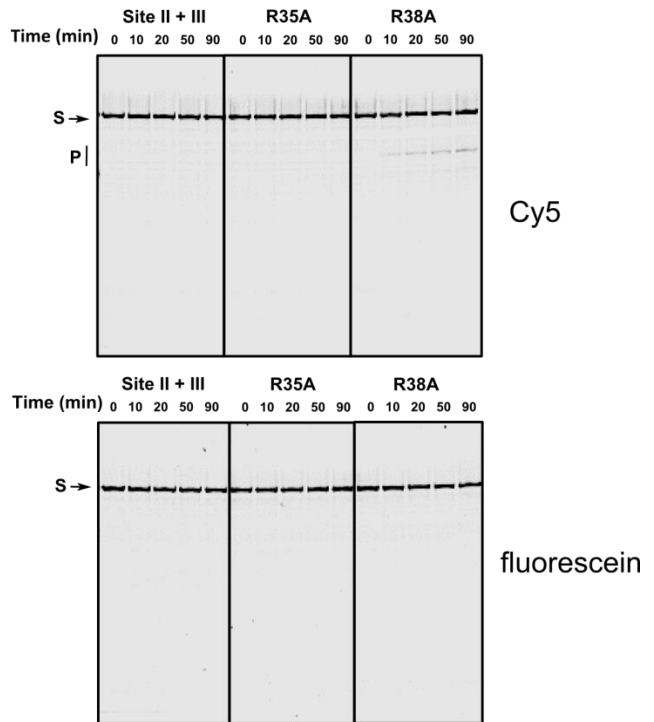

**Supplementary Figure S5. Representative gels that were used to quantify the activity of various mutants of *Cg-Slx1-Slx4*<sup>CCD</sup> on 5'-flap substrate. (A) Activity test of site III mutants. (B) Activity test of site II mutants. (C) Activity tests of site I mutants together with a mutant in which site II and site III were mutated. Upper gels in each panel present the activity of the Cy5-labeled strand. Lower gels in each panel present the activity of the fluorescein-labeled strand. Bands corresponding the substrate (S) and products of the reaction (P) are labeled on the right side of the panels.**

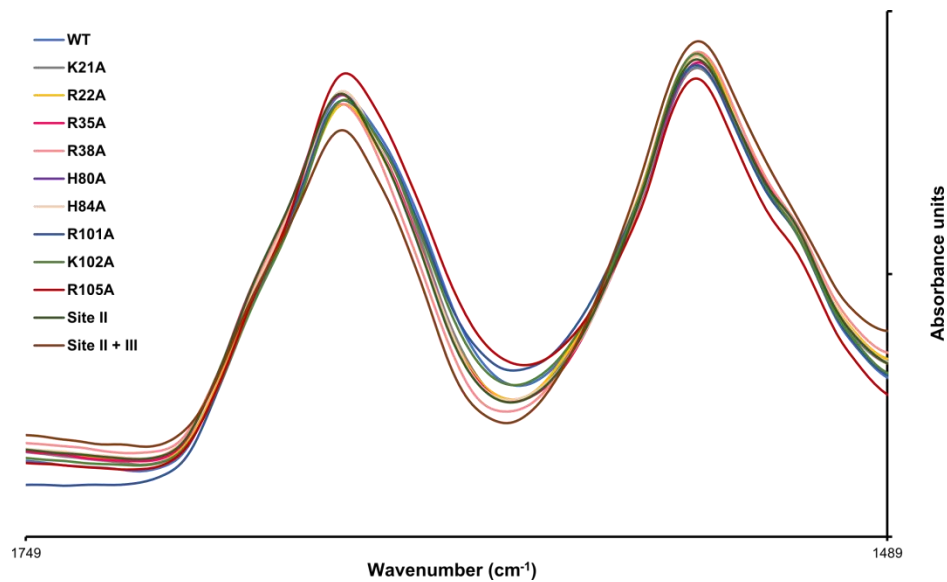

**Supplementary Figure S6. Secondary structure content and structural integrity of *Cg-Slx1-Slx4*<sup>CCD</sup> variants.** Fourier-Transform Infrared (FT-IR) spectrum of *Cg-Slx1-Slx4*<sup>CCD</sup> and various mutants (Supplementary Table S3).

**Supplementary Table S1. Sequences of oligonucleotides (written 5' to 3').**

| <b>Oligonucleotides used to generate substrates for activity test and binding studies.</b> |                                                                               |
|--------------------------------------------------------------------------------------------|-------------------------------------------------------------------------------|
| X0-1                                                                                       | ACGCTGCCGAATTCTACCAGTGCCTTGCTAGGACATCTTTGCCACCTGCAGGTTACCC                    |
| X0-2                                                                                       | GGGTGAACCTGCAGGTGGGCAAAGATGTCCATCTGTTGTAATCGTCAAGCTTTATGCCGT                  |
| X0-3                                                                                       | ACGGCATAAAGCTTGACGATTACAACAGATCATGGAGCTGTCTAGAGGATCCGACTATCG                  |
| X0-4                                                                                       | CGATAGTCGGATCCTCTAGACAGCTCCATGTAGCAAGGCACTGGTAGAATTCGGCAGCGT                  |
| X0-1 <sup>f</sup>                                                                          | (Fluorescein)ACGCTGCCGAATTCTACCAGTGCCTTGCTAGGACATCTTTGCCACCTGCAGGTTACCC       |
| X0-4 <sup>c</sup>                                                                          | CGATAGTCGGATCCTCTAGACAGCTCCATGTAGCAAGGCACTGGTAGAATTCGGCAGCGT (Cy5)            |
| X0-1 <sup>fc</sup>                                                                         | (Fluorescein)ACGCTGCCGAATTCTACCAGTGCCTTGCTAGGACATCTTTGCCACCTGCAGGTTACCC (Cy5) |
| X0-2.30                                                                                    | GGGTGAACCTGCAGGTGGGCAAAGATGTCC                                                |
| X0-3.30                                                                                    | CATGGAGCTGTCTAGAGGATCCGACTATCG                                                |
| X0-4.30                                                                                    | TAGCAAGGCACTGGTAGAATTCGGCAGCGT                                                |
| <b>Oligonucleotides used for mapping cleavage sites</b>                                    |                                                                               |
| X0-1.28 <sup>f</sup>                                                                       | (Fluorescein)ACGCTGCCGAATTCTACCAGTGCCTTGC                                     |
| X0-1.29 <sup>f</sup>                                                                       | (Fluorescein)ACGCTGCCGAATTCTACCAGTGCCTTGCT                                    |
| X0-1.31 <sup>f</sup>                                                                       | (Fluorescein)ACGCTGCCGAATTCTACCAGTGCCTTGCTAG                                  |
| X0-1.32 <sup>f</sup>                                                                       | (Fluorescein)ACGCTGCCGAATTCTACCAGTGCCTTGCTAGG                                 |
| X0-4.28 <sup>c</sup>                                                                       | GCAAGGCACTGGTAGAATTCGGCAGCGT(Cy5)                                             |
| X0-4.29 <sup>c</sup>                                                                       | AGCAAGGCACTGGTAGAATTCGGCAGCGT(Cy5)                                            |
| <b>Oligonucleotides used for crystallization</b>                                           |                                                                               |
| 114a                                                                                       | CAATCGGCAATGACCTTTGGTCATTCAGCAGAT                                             |
| 114b                                                                                       | ATCTGCTGAATCTGGTTTCCAGATTGCCGATTG                                             |



**Supplementary Table S2. Oligonucleotides that were used to generate DNA substrates.**

| Substrates                                                      | Unlabeled                    | Labeled                                                              |
|-----------------------------------------------------------------|------------------------------|----------------------------------------------------------------------|
| <b>Substrates used in crystallization</b>                       |                              |                                                                      |
| Holliday junction                                               | 114a, 114b                   |                                                                      |
| Splayed-arm                                                     | 114a                         |                                                                      |
| <b>Substrates used in activity test/fluorescence anisotropy</b> |                              |                                                                      |
| Holliday junction                                               | X0-1, X0-2, X0-3, X0-4       | Fluorescent: X0-1 <sup>f</sup> , X0-2, X0-3, X0-4 <sup>c</sup>       |
| Replication fork                                                | X0-1, X0-2.30, X0-3.30, X0-4 | Fluorescent: X0-1 <sup>f</sup> , X0-2.30, X0-3.30, X0-4 <sup>c</sup> |
| 5'-flap                                                         | X0-1, X0-2.30, X0-4          | Fluorescent: X0-1 <sup>f</sup> , X0-2.30, X0-4 <sup>c</sup>          |
| 3'-flap                                                         | X0-1, X0-3.30, X0-4          | Fluorescent: X0-1 <sup>f</sup> , X0-3.30, X0-4 <sup>c</sup>          |
| Splayed-arm                                                     | X0-1, X0-4                   | Fluorescent: X0-1 <sup>f</sup> , X0-4 <sup>c</sup>                   |
| Nicked DNA                                                      | X0-1, X0-2.30, X0-4.30       | Fluorescent: X0-1 <sup>fc</sup> , X0-2.30, X0-4.30                   |

<sup>f</sup> Fluorescein-labeled oligonucleotides. <sup>c</sup> Cy5-labeled oligonucleotides. <sup>fc</sup> Oligonucleotide labeled with Fluorescein at 5' end and Cy5 at 3' end.

**Supplementary Table S3. *Cg-Slx1-Slx4*<sup>CCD</sup> mutants that were used in the study.**

|                                          | Mutant name |                                                                                        |
|------------------------------------------|-------------|----------------------------------------------------------------------------------------|
| <b>Mutations in Site I</b>               |             |                                                                                        |
| 1                                        | R35A        | <i>Cg-Slx1</i> <sup>R35A</sup> - <i>Slx4</i> <sup>CCD</sup>                            |
| 2                                        | R38A        | <i>Cg-Slx1</i> <sup>R38A</sup> - <i>Slx4</i> <sup>CCD</sup>                            |
| <b>Mutations in Site II</b>              |             |                                                                                        |
| 1                                        | H80A        | <i>Cg-Slx1</i> <sup>H80A</sup> - <i>Slx4</i> <sup>CCD</sup>                            |
| 2                                        | H84A        | <i>Cg-Slx1</i> <sup>H84A</sup> - <i>Slx4</i> <sup>CCD</sup>                            |
| 3                                        | Site II     | <i>Cg-Slx1</i> <sup>H80A/H84A</sup> - <i>Slx4</i> <sup>CCD</sup>                       |
| <b>Mutations in Site III</b>             |             |                                                                                        |
| 1                                        | K21A        | <i>Cg-Slx1</i> <sup>K21A</sup> - <i>Slx4</i> <sup>CCD</sup>                            |
| 2                                        | R22A        | <i>Cg-Slx1</i> <sup>R22A</sup> - <i>Slx4</i> <sup>CCD</sup>                            |
| 3                                        | R101A       | <i>Cg-Slx1</i> <sup>R101A</sup> - <i>Slx4</i> <sup>CCD</sup>                           |
| 4                                        | K102A       | <i>Cg-Slx1</i> <sup>K102A</sup> - <i>Slx4</i> <sup>CCD</sup>                           |
| 5                                        | R105A       | <i>Cg-Slx1</i> <sup>R105A</sup> - <i>Slx4</i> <sup>CCD</sup>                           |
| <b>Mutations in Site II and Site III</b> |             |                                                                                        |
| 1                                        | Site I + II | <i>Cg-Slx1</i> <sup>H80A/H84A/K21A/R22A/R101A/K102A</sup> - <i>Slx4</i> <sup>CCD</sup> |
| <b>Others</b>                            |             |                                                                                        |
| 1                                        | E79Q        | <i>Cg-Slx1</i> <sup>E79Q</sup> - <i>Slx4</i> <sup>CCD</sup>                            |
| 2                                        | Wild type   | <i>Cg-Slx1-Slx4</i> <sup>CCD</sup>                                                     |
